# Supplementary material for: DNA-induced synthesis of biomimetic enzyme for sensitive detection of superoxide anions released from live cell
Source: Royal Society of Chemistry journal article supplement (doi:10.1039/c7ra12962a), 2018-01-01

Supporting information

## **DNA-induced Synthesis of Biomimetic Enzyme for Sensitive**

### **Detection of Superoxide Anions released from live cell**

Ailing Ding, Bin Wang\*, Xiaoqing Ma, Jianglin Diao, Jiushang Zheng, Jiucun Chen  
and Changming Li\*

Institute for Clean Energy & Advanced Materials, Faculty of Materials and Energy,  
Southwest University, Chongqing 400715, P.R. China.

E-mail: [bwang@swu.edu.cn](mailto:bwang@swu.edu.cn), [ecmli@swu.edu.cn](mailto:ecmli@swu.edu.cn)

Fig S1. Zeta potential of graphene, graphene/DNA and graphene/DNA/Mn<sub>3</sub>(PO<sub>4</sub>)<sub>2</sub>.

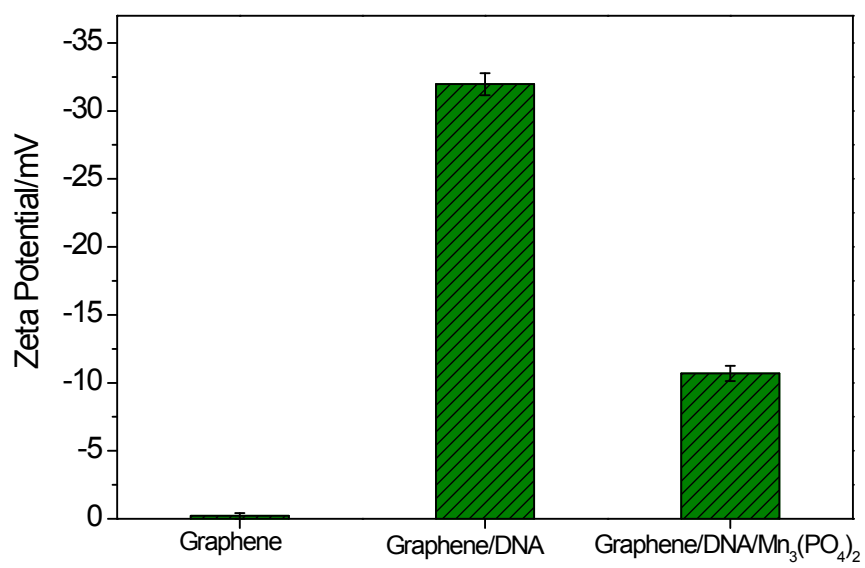

Fig. S2. EDS of the synthesized graphene/DNA/Mn<sub>3</sub>(PO<sub>4</sub>)<sub>2</sub>.

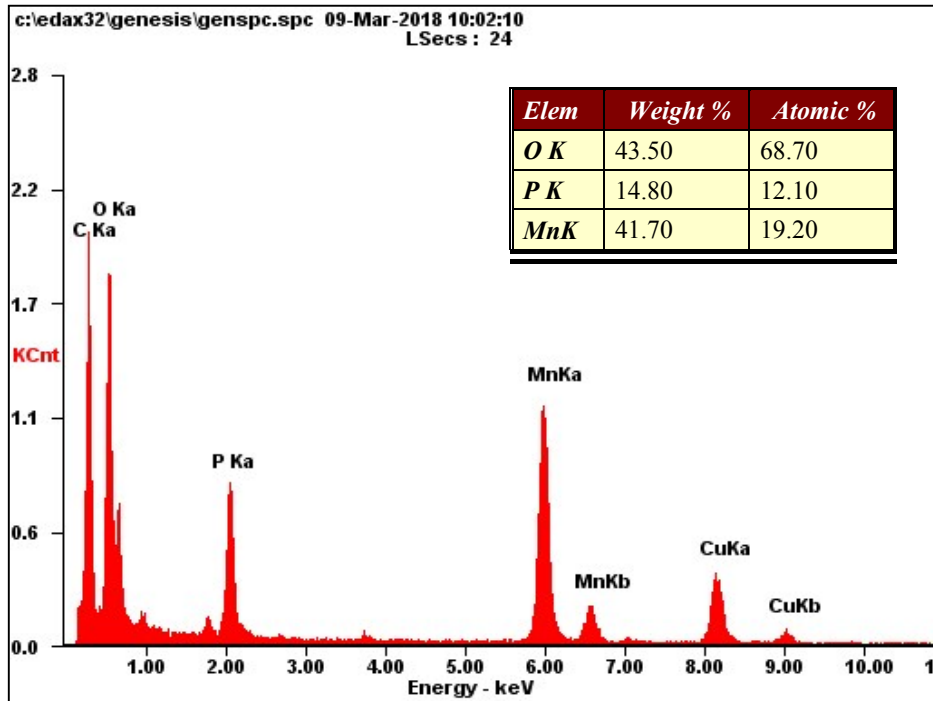

Fig. S3. Voltmammograms obtained at Graphene/Mn<sub>3</sub>(PO<sub>4</sub>)<sub>2</sub>/GCE (A), Mn<sub>3</sub>(PO<sub>4</sub>)<sub>2</sub>/DNA/GCE (B), Graphene/DNA/Mn<sup>2+</sup>/GCE (C) and Graphene/DNA/Mn<sub>3</sub>(PO<sub>4</sub>)<sub>2</sub>/GCE (D) in 0.01M PBS (pH =7.4) and in the presence of 1.0 μM O<sub>2</sub><sup>•-</sup> and the mixture of O<sub>2</sub><sup>•-</sup> and SOD (potential scan rate: 50 mV/s).

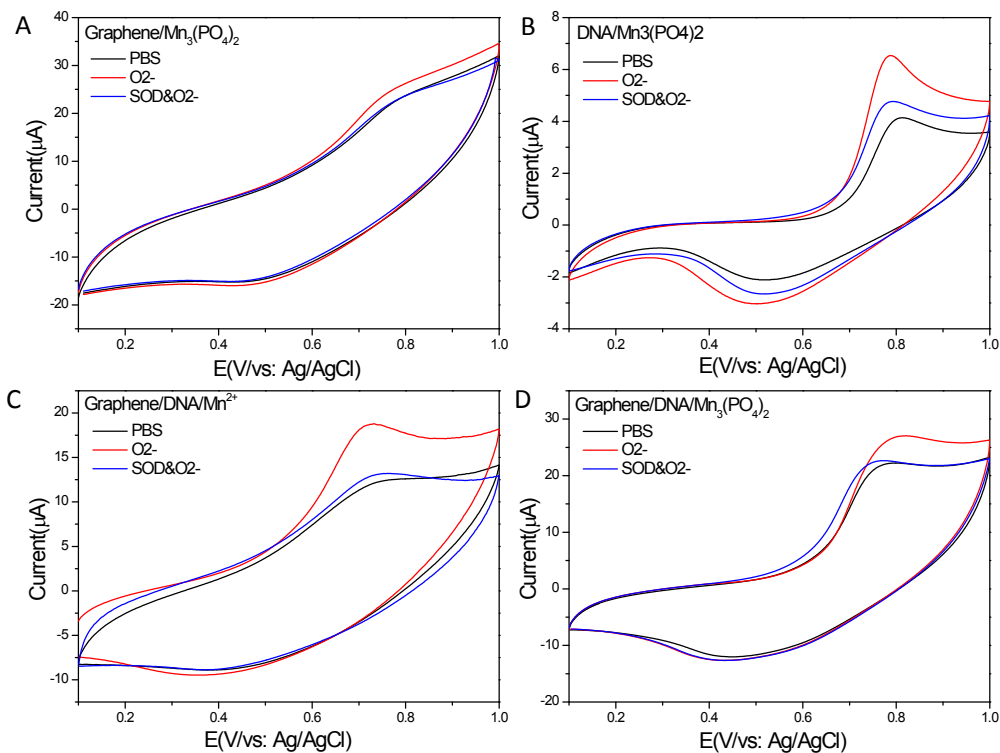

Fig. S4. The stability of the sensor.

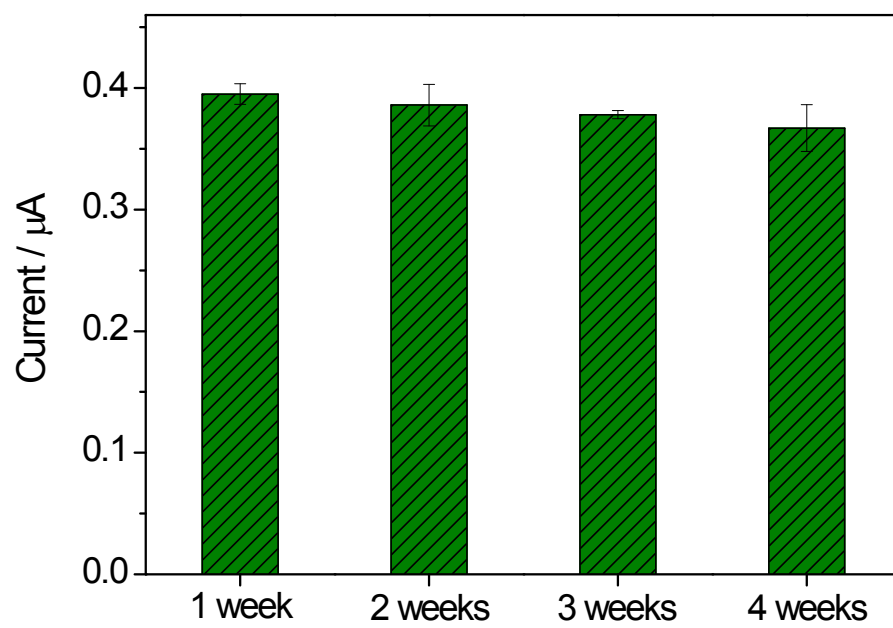

Supplement: c7ra12962a1.pdf [file c7ra12962a1.pdf]
